# Supplementary material
Source: Springer Nature journal article supplement (https://www.springermedizin.de/resource/supplementary/12885_2001_3_MOESM2_ESM.pdf/9460032)

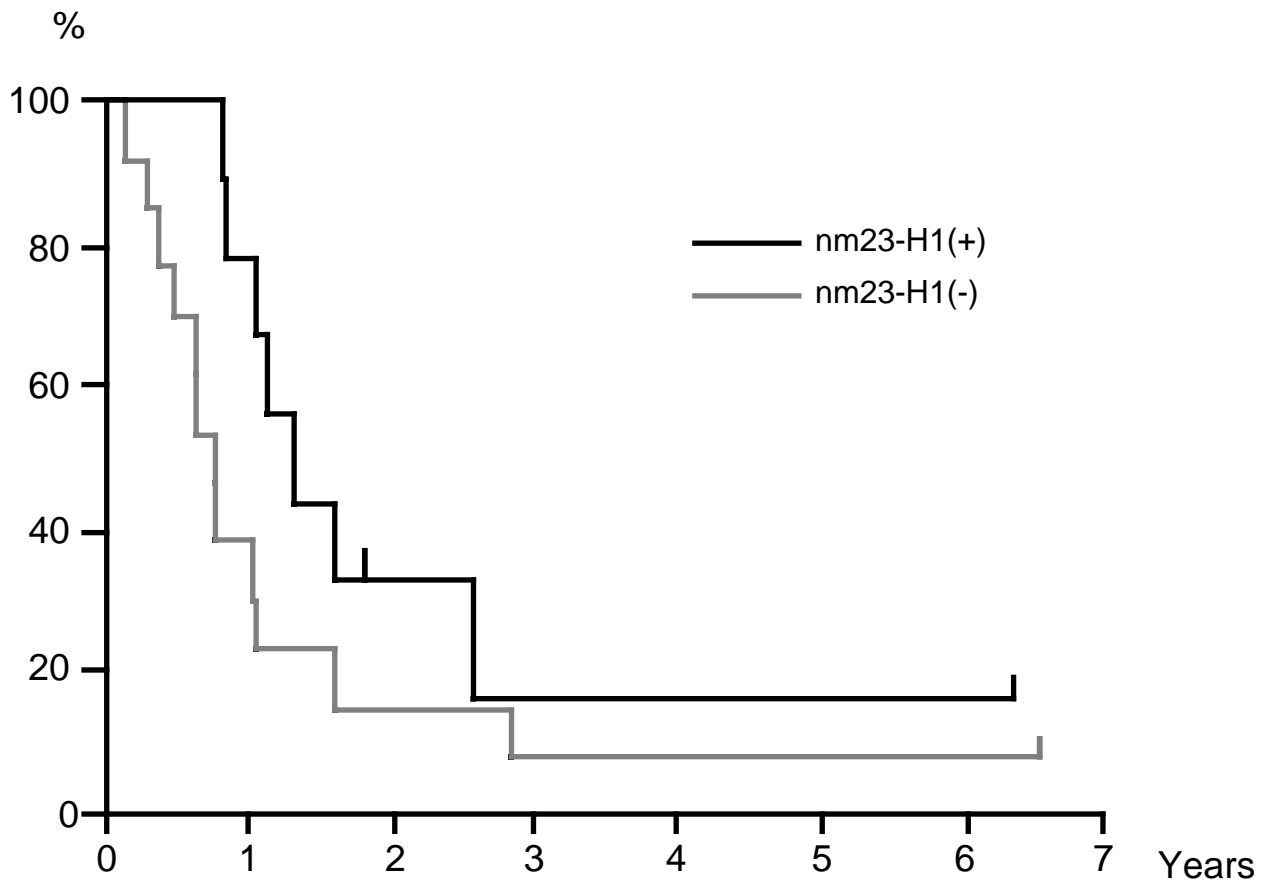

Supplement: MOESM2 [file 9460032]
